# Supplementary material
Source: PubMed Central journal article supplement (PMC8018782)
Supplement: NIHMS1655772-supplement-Todoric-Table.pdf [file NIHMS1655772-supplement-Todoric-Table.pdf]

**Supplementary Table 1.** Primer sequences

| <b>Gene name</b> | <b>Forward (5' - 3')</b>      | <b>Reverse (5' - 3')</b> |
|------------------|-------------------------------|--------------------------|
| <i>Acly</i>      | CTGTGCCACCATGTTCTCCTC         | AGGCCTGGTTCTTGGCTACTG    |
| <i>Acaca</i>     | TTCCACGTAGGAGGAGCTTCC         | CCTCCGGTGCCTTCTCATTAC    |
| <i>Fasn</i>      | AGAAGAGCCATGGAGGAGGTG         | ATGTCCACACCACCAATGAGG    |
| <i>Mlxipl</i>    | CGGATACGGACTTGGAGGATC         | GAAGTGTCCGCTGTGGATGAC    |
| <i>Srebf1</i>    | GATCAAAGAGGAGCCAGTGC          | TAGATGGTGGCTGCTGAGTG     |
| <i>Emr1</i>      | GACTGACAACCAGACGGCTTG         | TCACTGCCTCCACTAGCATCC    |
| <i>Tnf</i>       | GCACAGAAAGCA TGACCCG          | GCCCCCA TCTTTTGGG        |
| <i>Ccl2</i>      | GCCAGCTCTCTTCCCTCCA           | CCCAGAAGCA TGACAGGGAC    |
| <i>Ccl5</i>      | AATCCCCTACTCCACTCGG           | TTCTTGGGTTTGTGTGCAG      |
| <i>Il1b</i>      | CAACCAACAAGTGATATTCTCCAT<br>G | GATCCACACTCTCCAGCTGCA    |
| <i>Il6</i>       | GAGGATACCACTCCCAACAGACC       | AAGTGCATCATCGTTGTTCATACA |
| <i>Cldn1</i>     | ATCACCTTCGGGAGCTCAGGT         | TGATGGGGGTCAAGGGGTCAT    |
| <i>Cldn3</i>     | CTGGTCGGCCAACACCATCAT         | ATGGTTTGCCTGTCTCTGCC     |
| <i>Cldn4</i>     | GCAGAGCACAGGTCAGATGCA         | AGGGCAGGTCCTGGAGAATGT    |
| <i>Cldn5</i>     | TGGACCACAACATCGTGACGG         | TGCCTCCCGCCCTTAGACATA    |
| <i>Cldn6</i>     | CCCTTGGTGGCTGATGCTCAA         | AGGTGGAGCTTGGACTCAGGT    |
| <i>Cldn7</i>     | AACATCATCACAGCCCAGGCC         | ATGTTTGGAGGTGGAGTGGCC    |
| <i>Cldn8</i>     | GTGCTTGGTGGTGTGGCATG          | CGTTGAGTGGTGCATGGGAT     |
| <i>Cldn9</i>     | AAGTGGTATGGGAGGGGCTGT         | CGCAGGTGGAAGCTTCTGGAA    |
| <i>Cldn12</i>    | TGTGTGCAGATGTGCTCCTGT         | GCAGGAGGGCTTGAGCTGTAT    |
| <i>Cldn13</i>    | GGCTCTTGGAAATCCTGCATCT        | TGGCATCTGGGTCTGTCTCAT    |
| <i>Cldn14</i>    | CTAACCAGAGGGCATGTGTGC         | AGTCCCATCCACCTTGATGCT    |
| <i>Cldn19</i>    | GGAATTCTTCAACCCAGCAC          | ATAGGGCTGTGGGATGCTGTT    |
| <i>Ocln</i>      | TCCGGATCCTGTCTATGCTCA         | ATAGCCACCTCCGTAGCCAAA    |
| <i>Tjp1</i>      | GAAACTCTGCTGAGCCCCCTA         | GTTTTAGGGTCACCCGACGAG    |
| <i>Tjp2</i>      | CGAAGCAGTCTGGGTCTCTGA         | CCGGCTCCTCTAGCTCATTGT    |
| <i>Tjp3</i>      | ATGGTATGCCATTTTCGGAACC        | CCGGGTACAACGTGTCCACTA    |
| <i>Ctgf</i>      | CAGAGTGGAGCGCCTGTTCTA         | AGGTGTCCGGATGCACTTTTT    |
| <i>Ccne</i>      | GTCTGCAAGATGCCTTGGATG         | CAACCTACAACACCCGAGCAG    |
| <i>Reg3b</i>     | ATGGCTCCTACTGCTATGCC          | GTGTCCTCCAGGCCTCTTT      |
| <i>Reg3g</i>     | ATGGCTCCTATTGCTATGCC          | GATGTCCTGAGGGCCTCTT      |
| <i>Lcn2</i>      | ACATTTGTTCCAAGCTCCAGGGC       | CATGGCGAACTGGTTGTAGTCGG  |
| <i>Il22</i>      | GGCCAGCCTTGACAGATAACA         | GCTGATGTGACAGGAGCTGA     |
| <i>S100a9</i>    | GGTGGAAAGCACAGTTGGCA          | GTGTCCAGGTCCTCCATGATG    |
| <i>18s</i>       | AGCCCCTGCCCTTTGTACACA         | CGATCCGAGGGCCTCACTA      |

**Supplementary Table 2**

| Analytes             | Retention Time (min) | Precursor Ion | Product Ion | Dwell | Fragmen tor | Collision Energy | Cell Accelerat or Volta ge |
|----------------------|----------------------|---------------|-------------|-------|-------------|------------------|----------------------------|
| Fructose 1 Phosphate | 8.41                 | 259.02        | 259.02      | 200   | 380         | 0                | 5                          |
